# Supplementary material for: Dihydroartemisinin-Transferrin Adducts Enhance TRAIL-Induced Apoptosis in Triple-Negative Breast Cancer in a P53-Independent and ROS-Dependent Manner
Source: PubMed Central journal article supplement (PMC8762273; doi:10.3389/fonc.2021.789336), 2022-01-03
Supplement: DataSheet_1.pdf [file DataSheet_1.pdf]

## Dihydroartemisinin-transferrin adducts enhance TRAIL-induced apoptosis in triple-negative breast cancer

Xinyu Zhou<sup>1</sup>, Abel Soto-Gamez<sup>1,2</sup>, Fleur Nijdam<sup>1</sup>, Rita Setroikromo<sup>1</sup>, Wim J Quax<sup>1\*</sup>

<sup>1</sup> Department of Chemical and Pharmaceutical Biology, Groningen Research Institute of Pharmacy, University of Groningen, Groningen, Netherlands

<sup>2</sup> European Institute for the Biology of Aging (ERIBA), University Medical Center Groningen (UMCG), Groningen, Netherlands.

### *Supplementary Material*

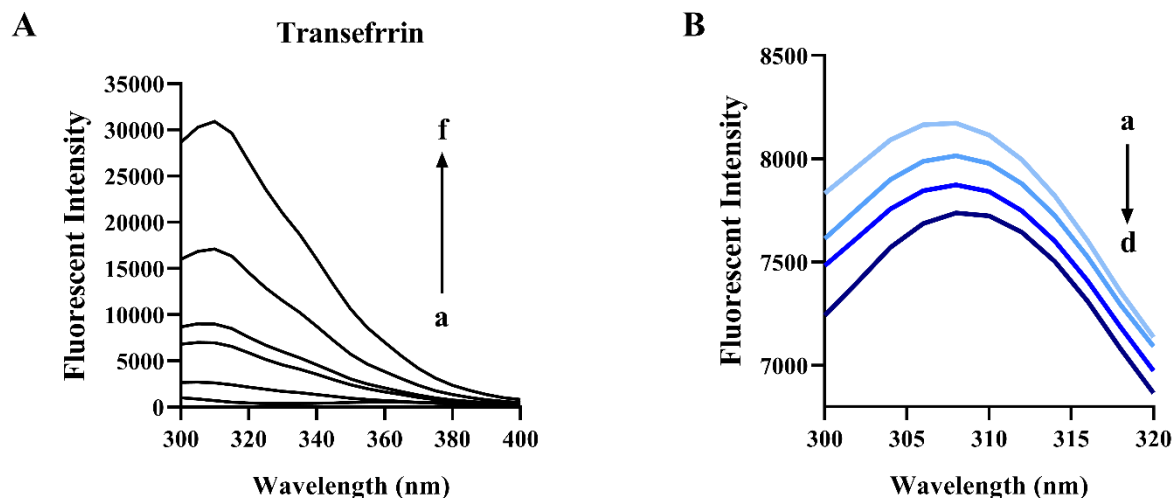

**Supplementary Figure 1. DHA quenches intrinsic fluorescence of transferrin ( $\lambda_{ex}=270$  nm).** (A) The intrinsic fluorescence of transferrin at different concentrations was measured, and the peak was recorded at 310 nm. Curves from (a) to (f) represent 0, 1, 3, 5, 10, 30  $\mu$ M of TF, respectively. (B) The intrinsic fluorescence of 10  $\mu$ M TF was quenched with an increasing concentration of DHA. Curves from (a) to (d) represent 0, 1, 5, 10  $\mu$ M of DHA, respectively.

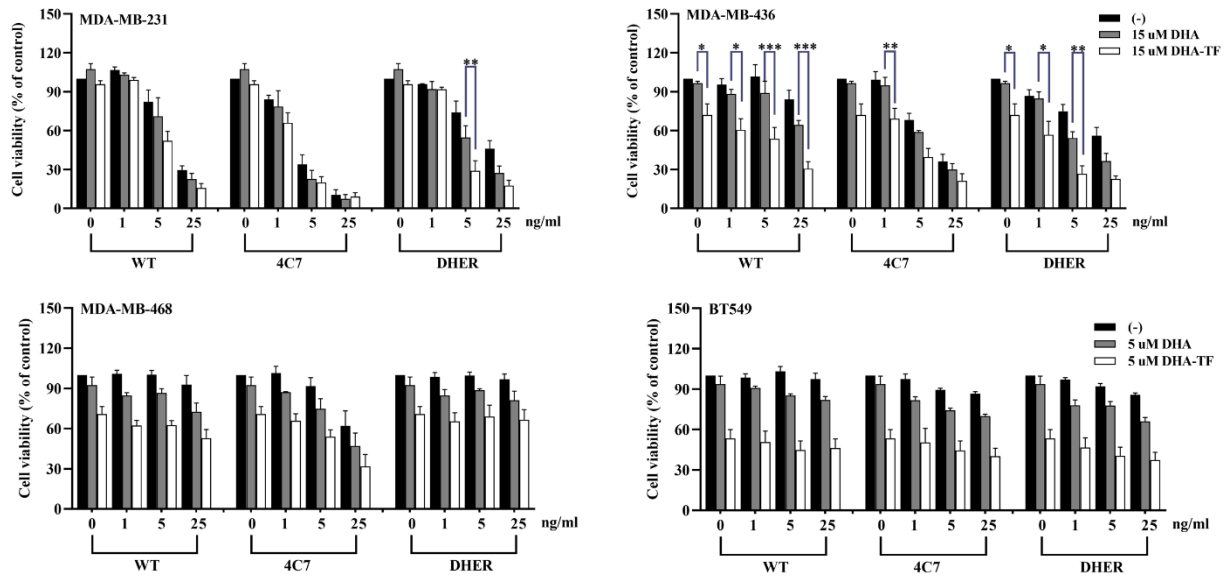

**Supplementary Figure 2. Combination treatment of DHA/DHA-TF with different concentration of TRAIL variants.** All cell lines were pre-treated with DHA or DHA-TF for 30 min, followed with 0, 1, 5, 25 ng/mL rhTRAIL WT, 4C7, or DHER for 24 h. Cell viability was determined by MTS assay. Data shown are mean  $\pm$  SEM from three independent experiments performed in triplicate.

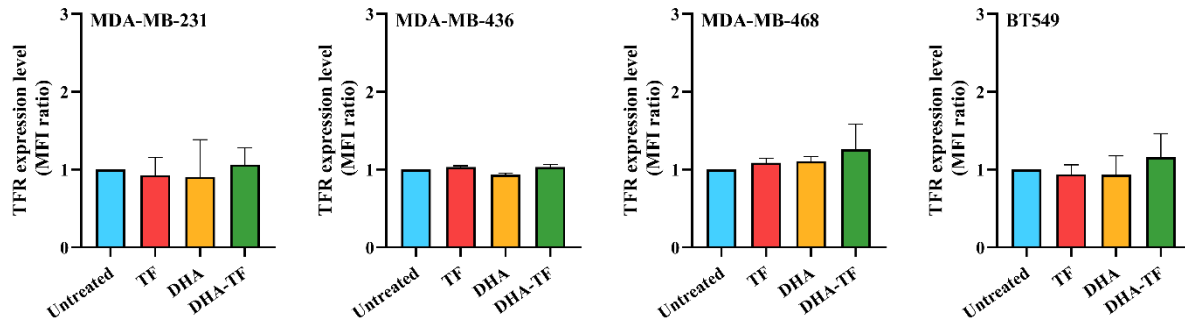

**Supplementary Figure 3. Transferrin receptor expression on TNBC cells after treated with TF, DHA, or DHA-TF.** TF, DHA, or DHA-TF were applied to MDA-MB-231 (15  $\mu$ M), MDA-MB-436 (15  $\mu$ M), MBA-MD-468 (5  $\mu$ M), and BT549 (5  $\mu$ M) for 24 h. The mean fluorescence intensity (MFI) ratio is relative to unstained cells with mean  $\pm$  SEM from three independent experiments.
